# Supplementary material for: Expanding the accessible chemical space by solid phase synthesis of bicyclic homodetic peptides
Source: Royal Society of Chemistry journal article supplement (doi:10.1039/c1cc15704c), 2011-01-01
Supplement: c1cc15704c.sdf [file c1cc15704c.sdf]

                    3D
 Structure written by MMmdl.
 95 98  0  0  1  0            999 V2000
    4.8124    3.9494   -6.9670 N   0  0  0  0  0  0
    4.0605    4.4613   -7.3932 H   0  0  0  0  0  0
    4.9166    4.1386   -5.9082 C   0  0  1  0  0  0
    5.8854    4.6479   -5.7246 H   0  0  0  0  0  0
    3.8554    5.2076   -5.5047 C   0  0  0  0  0  0
    3.9322    6.0590   -6.1783 H   0  0  0  0  0  0
    2.8756    4.7468   -5.5891 H   0  0  0  0  0  0
    3.9563    5.7565   -4.0516 C   0  0  0  0  0  0
    3.8354    4.9057   -3.3823 H   0  0  0  0  0  0
    5.2825    6.4797   -3.8109 C   0  0  0  0  0  0
    6.1222    5.7888   -3.8561 H   0  0  0  0  0  0
    5.4366    7.2174   -4.5697 H   0  0  0  0  0  0
    5.2714    6.9776   -2.8214 H   0  0  0  0  0  0
    2.7927    6.7215   -3.8157 C   0  0  0  0  0  0
    1.8681    6.2025   -4.0180 H   0  0  0  0  0  0
    2.8299    7.1007   -2.7729 H   0  0  0  0  0  0
    2.8524    7.5723   -4.5031 H   0  0  0  0  0  0
    4.9037    2.9067   -4.9267 C   0  0  0  0  0  0
    5.7651    2.8958   -4.0347 O   0  0  0  0  0  0
    4.1700    2.1653   -5.0497 N   0  0  0  0  0  0
    3.5201    2.3944   -5.8015 H   0  0  0  0  0  0
    4.0172    1.2078   -4.5991 C   0  0  0  0  0  0
    4.1427    1.2085   -3.5047 H   0  0  0  0  0  0
    2.9780    0.9914   -4.7576 H   0  0  0  0  0  0
    4.8165   -0.0121   -5.1751 C   0  0  0  0  0  0
    5.3418   -0.7883   -4.3578 O   0  0  0  0  0  0
    4.8037   -0.1405   -6.2171 N   0  0  0  0  0  0
    4.2229    0.5517   -6.6815 H   0  0  0  0  0  0
    5.1738   -0.8569   -6.9177 C   0  0  1  0  0  0
    5.9429   -1.5114   -6.4969 H   0  0  0  0  0  0
    4.0443   -1.7930   -7.4994 C   0  0  0  0  0  0
    4.4710   -2.4135   -8.3038 H   0  0  0  0  0  0
    3.8252   -2.5277   -6.7277 H   0  0  0  0  0  0
    3.1906   -1.2672   -7.8741 N   0  0  0  0  0  0
    3.4105   -0.7125   -8.6850 H   0  0  0  0  0  0
    5.7853   -0.1489   -8.1521 C   0  0  0  0  0  0
    5.0049    0.5195   -8.8478 O   0  0  0  0  0  0
    6.8155   -0.2936   -8.3467 N   0  0  0  0  0  0
    7.2777   -0.9185   -7.7085 H   0  0  0  0  0  0
    7.4746    0.1832   -9.0448 C   0  0  1  0  0  0
    7.5082    1.2555   -8.8346 H   0  0  0  0  0  0
    8.9283   -0.2353   -8.7455 C   0  0  0  0  0  0
    9.0784   -1.3010   -8.9792 H   0  0  0  0  0  0
    9.6003    0.3210   -9.4287 H   0  0  0  0  0  0
    9.4096   -0.0020   -7.3220 C   0  0  0  0  0  0
    9.5757   -1.0654   -6.4078 C   0  0  0  0  0  0
    9.3989   -2.0879   -6.7389 H   0  0  0  0  0  0
    9.9758   -0.8095   -5.0852 C   0  0  0  0  0  0
   10.1098   -1.6475   -4.4005 H   0  0  0  0  0  0
   10.1930    0.5093   -4.6585 C   0  0  0  0  0  0
   10.4760    0.7039   -3.6122 H   0  0  0  0  0  0
    9.9769    1.5811   -5.5489 C   0  0  0  0  0  0
   10.1247    2.6258   -5.2414 H   0  0  0  0  0  0
    9.6201    1.3175   -6.8722 C   0  0  0  0  0  0
    9.5251    2.1587   -7.5474 H   0  0  0  0  0  0
    7.0984   -0.0298  -10.5688 C   0  0  0  0  0  0
    7.3160   -1.1923  -10.9765 O   0  0  0  0  0  0
    6.6639    0.7921  -11.1662 N   0  0  0  0  0  0
    5.8888    0.6273  -11.9245 C   0  0  0  0  0  0
    5.0092    1.2708  -11.7617 H   0  0  0  0  0  0
    5.4353   -0.3898  -11.9977 H   0  0  0  0  0  0
    6.4869    0.9939  -13.2858 C   0  0  0  0  0  0
    5.7360    1.3070  -13.9962 H   0  0  0  0  0  0
    7.1615    0.2163  -13.6618 H   0  0  0  0  0  0
    7.2633    2.1483  -12.7241 C   0  0  0  0  0  0
    6.7958    3.1009  -12.9670 H   0  0  0  0  0  0
    8.3238    2.1287  -13.0621 H   0  0  0  0  0  0
    7.1037    1.7989  -11.2419 C   0  0  1  0  0  0
    8.1236    1.8214  -10.8832 H   0  0  0  0  0  0
    6.5222    3.0551  -10.4649 C   0  0  0  0  0  0
    7.1685    4.1123  -10.6134 O   0  0  0  0  0  0
    5.6939    2.9514   -9.8252 N   0  0  0  0  0  0
    5.4228    1.9836   -9.6980 H   0  0  0  0  0  0
    5.1252    3.6199   -9.2008 C   0  0  1  0  0  0
    5.4064    4.6680   -9.3572 H   0  0  0  0  0  0
    3.6085    3.6244   -9.6045 C   0  0  0  0  0  0
    3.0563    4.2523   -8.8853 H   0  0  0  0  0  0
    3.5384    4.1465  -10.5453 H   0  0  0  0  0  0
    2.8414    2.3018   -9.7924 C   0  0  0  0  0  0
    1.9518    2.5316  -10.3768 H   0  0  0  0  0  0
    3.4323    1.6049  -10.4042 H   0  0  0  0  0  0
    2.3389    1.6160   -8.5116 C   0  0  0  0  0  0
    2.6916    2.0538   -7.3952 O   0  0  0  0  0  0
    5.4167    3.4341   -7.6539 C   0  0  0  0  0  0
    6.3838    2.7127   -7.3198 O   0  0  0  0  0  0
    1.7616    0.7543   -8.6590 N   0  0  0  0  0  0
    1.7084    0.4765   -9.6255 H   0  0  0  0  0  0
    1.2920    0.0391   -8.0207 C   0  0  1  0  0  0
    0.8959    0.5235   -7.1087 H   0  0  0  0  0  0
    0.0566   -0.5197   -8.7737 C   0  0  0  0  0  0
   -0.4758   -1.2048   -8.1185 H   0  0  0  0  0  0
   -0.6465    0.2746   -9.0343 H   0  0  0  0  0  0
    0.3305   -1.0678   -9.6899 H   0  0  0  0  0  0
    2.2094   -1.1272   -7.4802 C   0  0  0  0  0  0
    1.7120   -1.8214   -6.5625 O   0  0  0  0  0  0
  1  2  1  0  0  0
  1  3  1  0  0  0
  1 84  1  0  0  0
  3  4  1  0  0  0
  3  5  1  0  0  0
  3 18  1  0  0  0
  5  6  1  0  0  0
  5  7  1  0  0  0
  5  8  1  0  0  0
  8  9  1  0  0  0
  8 10  1  0  0  0
  8 14  1  0  0  0
 10 11  1  0  0  0
 10 12  1  0  0  0
 10 13  1  0  0  0
 14 15  1  0  0  0
 14 16  1  0  0  0
 14 17  1  0  0  0
 18 19  1  0  0  0
 18 20  1  0  0  0
 20 21  1  0  0  0
 20 22  1  0  0  0
 22 23  1  0  0  0
 22 24  1  0  0  0
 22 25  1  0  0  0
 25 26  1  0  0  0
 25 27  1  0  0  0
 27 28  1  0  0  0
 27 29  1  0  0  0
 29 30  1  0  0  0
 29 31  1  0  0  0
 29 36  1  0  0  0
 31 32  1  0  0  0
 31 33  1  0  0  0
 31 34  1  0  0  0
 34 35  1  0  0  0
 34 94  1  0  0  0
 36 37  1  0  0  0
 36 38  1  0  0  0
 38 39  1  0  0  0
 38 40  1  0  0  0
 40 41  1  0  0  0
 40 42  1  0  0  0
 40 56  1  0  0  0
 42 43  1  0  0  0
 42 44  1  0  0  0
 42 45  1  0  0  0
 45 46  1  0  0  0
 45 54  1  0  0  0
 46 47  1  0  0  0
 46 48  1  0  0  0
 48 49  1  0  0  0
 48 50  1  0  0  0
 50 51  1  0  0  0
 50 52  1  0  0  0
 52 53  1  0  0  0
 52 54  1  0  0  0
 54 55  1  0  0  0
 56 57  1  0  0  0
 56 58  1  0  0  0
 58 59  1  0  0  0
 58 68  1  0  0  0
 59 60  1  0  0  0
 59 61  1  0  0  0
 59 62  1  0  0  0
 62 63  1  0  0  0
 62 64  1  0  0  0
 62 65  1  0  0  0
 65 66  1  0  0  0
 65 67  1  0  0  0
 65 68  1  0  0  0
 68 69  1  0  0  0
 68 70  1  0  0  0
 70 71  1  0  0  0
 70 72  1  0  0  0
 72 73  1  0  0  0
 72 74  1  0  0  0
 74 75  1  0  0  0
 74 76  1  0  0  0
 74 84  1  0  0  0
 76 77  1  0  0  0
 76 78  1  0  0  0
 76 79  1  0  0  0
 79 80  1  0  0  0
 79 81  1  0  0  0
 79 82  1  0  0  0
 82 83  1  0  0  0
 82 86  1  0  0  0
 84 85  1  0  0  0
 86 87  1  0  0  0
 86 88  1  0  0  0
 88 89  1  0  0  0
 88 90  1  0  0  0
 88 94  1  0  0  0
 90 91  1  0  0  0
 90 92  1  0  0  0
 90 93  1  0  0  0
 94 95  1  0  0  0
M  END
> <s_m_entry_name>
test.97

> <r_chorus_box_ax>
0

> <r_chorus_box_ay>
0

> <r_chorus_box_az>
0

> <r_chorus_box_bx>
0

> <r_chorus_box_by>
0

> <r_chorus_box_bz>
0

> <r_chorus_box_cx>
0

> <r_chorus_box_cy>
0

> <r_chorus_box_cz>
0

> <s_m_entry_id>
8

$$$$
