# Supplementary material for: Expanding the accessible chemical space by solid phase synthesis of bicyclic homodetic peptides
Source: Royal Society of Chemistry journal article supplement (doi:10.1039/c1cc15704c), 2011-01-01
Supplement: c1cc15704c_2.sdf [file c1cc15704c_2.sdf]

                    3D
 Structure written by MMmdl.
111114  0  0  1  0            999 V2000
    4.9624   -0.6554   -9.5249 N   0  0  0  0  0  0
    5.8381   -0.8358   -9.0749 H   0  0  0  0  0  0
    4.0115    0.1422   -8.7509 C   0  0  1  0  0  0
    3.5206    0.8117   -9.4482 H   0  0  0  0  0  0
    2.9785   -0.8195   -8.1091 C   0  0  0  0  0  0
    2.5577   -1.4568   -8.8887 H   0  0  0  0  0  0
    3.5146   -1.4704   -7.4182 H   0  0  0  0  0  0
    1.8074   -0.1681   -7.3439 C   0  0  0  0  0  0
    2.1918    0.4533   -6.5388 H   0  0  0  0  0  0
    0.9173    0.6848   -8.2548 C   0  0  0  0  0  0
    0.0872    1.0911   -7.6711 H   0  0  0  0  0  0
    1.4927    1.5090   -8.6719 H   0  0  0  0  0  0
    0.5191    0.0786   -9.0669 H   0  0  0  0  0  0
    0.9295   -1.2450   -6.7104 C   0  0  0  0  0  0
    1.5251   -1.8622   -6.0345 H   0  0  0  0  0  0
    0.1299   -0.7779   -6.1278 H   0  0  0  0  0  0
    0.5006   -1.8823   -7.4841 H   0  0  0  0  0  0
    4.7451    0.9914   -7.6978 C   0  0  0  0  0  0
    5.8056    0.5911   -7.2099 O   0  0  0  0  0  0
    4.1563    2.1287   -7.3207 N   0  0  0  0  0  0
    3.3240    2.4082   -7.8203 H   0  0  0  0  0  0
    4.6272    3.0290   -6.2631 C   0  0  1  0  0  0
    3.9554    3.8877   -6.2745 H   0  0  0  0  0  0
    4.4417    2.3646   -4.8871 C   0  0  0  0  0  0
    4.6382    3.0977   -4.0971 H   0  0  0  0  0  0
    3.4186    2.0060   -4.7917 H   0  0  0  0  0  0
    5.1266    1.5269   -4.7734 H   0  0  0  0  0  0
    6.0242    3.6242   -6.5342 C   0  0  0  0  0  0
    6.8548    3.7871   -5.6355 O   0  0  0  0  0  0
    6.2720    3.9781   -7.8014 N   0  0  0  0  0  0
    5.5575    3.7652   -8.4733 H   0  0  0  0  0  0
    7.4343    4.7528   -8.2424 C   0  0  2  0  0  0
    7.8271    5.2745   -7.3692 H   0  0  0  0  0  0
    7.0123    5.8299   -9.2602 C   0  0  0  0  0  0
    7.9077    6.2756   -9.6852 H   0  0  0  0  0  0
    6.4412    5.3740  -10.0618 H   0  0  0  0  0  0
    6.1894    6.9586   -8.6067 C   0  0  0  0  0  0
    5.2782    6.5599   -8.1703 H   0  0  0  0  0  0
    6.7800    7.3812   -7.7922 H   0  0  0  0  0  0
    5.8434    8.0907   -9.5871 C   0  0  0  0  0  0
    6.0659    9.0394   -9.1028 H   0  0  0  0  0  0
    6.4736    8.0338  -10.4718 H   0  0  0  0  0  0
    4.3651    8.1277  -10.0060 C   0  0  0  0  0  0
    3.7422    8.2115   -9.1290 H   0  0  0  0  0  0
    4.2203    8.9661  -10.6709 H   0  0  0  0  0  0
    3.9703    6.9516  -10.7363 N   0  0  0  0  0  0
    4.2962    6.8809  -11.6905 H   0  0  0  0  0  0
    8.5894    3.8619   -8.7311 C   0  0  0  0  0  0
    8.8494    3.7330   -9.9285 O   0  0  0  0  0  0
    9.3011    3.2671   -7.7707 N   0  0  0  0  0  0
    8.9860    3.4228   -6.8206 H   0  0  0  0  0  0
   10.6038    2.6112   -7.9585 C   0  0  0  0  0  0
   11.2752    3.3085   -8.4667 H   0  0  0  0  0  0
   11.0415    2.4024   -6.9785 H   0  0  0  0  0  0
   10.5659    1.3060   -8.7691 C   0  0  0  0  0  0
   11.1267    1.2737   -9.8663 O   0  0  0  0  0  0
    9.9255    0.2235   -8.2711 N   0  0  0  0  0  0
    9.3777    0.0903   -6.9272 C   0  0  0  0  0  0
    8.3311    0.3979   -6.9279 H   0  0  0  0  0  0
    9.9405    0.6689   -6.1926 H   0  0  0  0  0  0
    9.4827   -1.3948   -6.5898 C   0  0  0  0  0  0
    8.7254   -1.6944   -5.8719 H   0  0  0  0  0  0
   10.4799   -1.6075   -6.2068 H   0  0  0  0  0  0
    9.2860   -2.0626   -7.9423 C   0  0  0  0  0  0
    8.2207   -2.1269   -8.1617 H   0  0  0  0  0  0
    9.7492   -3.0511   -7.9734 H   0  0  0  0  0  0
    9.9607   -1.0968   -8.9221 C   0  0  1  0  0  0
   10.9970   -1.3552   -9.0421 H   0  0  0  0  0  0
    9.3161   -1.1716  -10.3070 C   0  0  0  0  0  0
    9.7008   -1.9748  -11.1603 O   0  0  0  0  0  0
    8.3495   -0.2947  -10.5135 N   0  0  0  0  0  0
    8.2353    0.3360   -9.7398 H   0  0  0  0  0  0
    7.7486    0.0912  -11.7936 C   0  0  1  0  0  0
    8.5532    0.3113  -12.4958 H   0  0  0  0  0  0
    6.8638   -1.0291  -12.3908 C   0  0  0  0  0  0
    6.2469   -0.6135  -13.1868 H   0  0  0  0  0  0
    7.5403   -1.7371  -12.8730 H   0  0  0  0  0  0
    5.9666   -1.8418  -11.4371 C   0  0  0  0  0  0
    5.5299   -2.6680  -12.0036 H   0  0  0  0  0  0
    6.5774   -2.2951  -10.6535 H   0  0  0  0  0  0
    4.8333   -1.0274  -10.8019 C   0  0  0  0  0  0
    3.7760   -0.8395  -11.4669 O   0  0  0  0  0  0
    6.9789    1.4123  -11.6528 C   0  0  0  0  0  0
    6.4408    1.7257  -10.5867 O   0  0  0  0  0  0
    6.9461    2.1997  -12.7280 N   0  0  0  0  0  0
    7.4928    1.9317  -13.5325 H   0  0  0  0  0  0
    6.3221    3.5180  -12.7416 C   0  0  1  0  0  0
    6.8245    4.0927  -11.9717 H   0  0  0  0  0  0
    6.5826    4.2364  -14.0752 C   0  0  0  0  0  0
    7.6458    4.1720  -14.3111 H   0  0  0  0  0  0
    6.0291    3.7353  -14.8690 H   0  0  0  0  0  0
    6.1912    5.7043  -14.0299 C   0  0  0  0  0  0
    4.9337    6.1191  -14.5099 C   0  0  0  0  0  0
    4.2495    5.3987  -14.9431 H   0  0  0  0  0  0
    4.5488    7.4714  -14.4135 C   0  0  0  0  0  0
    3.5854    7.7858  -14.7893 H   0  0  0  0  0  0
    5.4193    8.4130  -13.8342 C   0  0  0  0  0  0
    5.1311    9.4507  -13.7637 H   0  0  0  0  0  0
    6.6738    7.9972  -13.3532 C   0  0  0  0  0  0
    7.3481    8.7217  -12.9180 H   0  0  0  0  0  0
    7.0617    6.6458  -13.4435 C   0  0  0  0  0  0
    8.0281    6.3433  -13.0616 H   0  0  0  0  0  0
    4.8238    3.4849  -12.3873 C   0  0  0  0  0  0
    4.0794    2.5784  -12.7670 O   0  0  0  0  0  0
    4.4013    4.5115  -11.6544 N   0  0  0  0  0  0
    5.0370    5.2602  -11.4214 H   0  0  0  0  0  0
    3.0789    4.7261  -11.0988 C   0  0  0  0  0  0
    2.3656    4.8415  -11.9077 H   0  0  0  0  0  0
    2.8129    3.8882  -10.4585 H   0  0  0  0  0  0
    3.1395    6.0180  -10.2761 C   0  0  0  0  0  0
    2.5646    6.1206   -9.1973 O   0  0  0  0  0  0
  1  2  1  0  0  0
  1  3  1  0  0  0
  1 81  1  0  0  0
  3  4  1  0  0  0
  3  5  1  0  0  0
  3 18  1  0  0  0
  5  6  1  0  0  0
  5  7  1  0  0  0
  5  8  1  0  0  0
  8  9  1  0  0  0
  8 10  1  0  0  0
  8 14  1  0  0  0
 10 11  1  0  0  0
 10 12  1  0  0  0
 10 13  1  0  0  0
 14 15  1  0  0  0
 14 16  1  0  0  0
 14 17  1  0  0  0
 18 19  1  0  0  0
 18 20  1  0  0  0
 20 21  1  0  0  0
 20 22  1  0  0  0
 22 23  1  0  0  0
 22 24  1  0  0  0
 22 28  1  0  0  0
 24 25  1  0  0  0
 24 26  1  0  0  0
 24 27  1  0  0  0
 28 29  1  0  0  0
 28 30  1  0  0  0
 30 31  1  0  0  0
 30 32  1  0  0  0
 32 33  1  0  0  0
 32 34  1  0  0  0
 32 48  1  0  0  0
 34 35  1  0  0  0
 34 36  1  0  0  0
 34 37  1  0  0  0
 37 38  1  0  0  0
 37 39  1  0  0  0
 37 40  1  0  0  0
 40 41  1  0  0  0
 40 42  1  0  0  0
 40 43  1  0  0  0
 43 44  1  0  0  0
 43 45  1  0  0  0
 43 46  1  0  0  0
 46 47  1  0  0  0
 46110  1  0  0  0
 48 49  1  0  0  0
 48 50  1  0  0  0
 50 51  1  0  0  0
 50 52  1  0  0  0
 52 53  1  0  0  0
 52 54  1  0  0  0
 52 55  1  0  0  0
 55 56  1  0  0  0
 55 57  1  0  0  0
 57 58  1  0  0  0
 57 67  1  0  0  0
 58 59  1  0  0  0
 58 60  1  0  0  0
 58 61  1  0  0  0
 61 62  1  0  0  0
 61 63  1  0  0  0
 61 64  1  0  0  0
 64 65  1  0  0  0
 64 66  1  0  0  0
 64 67  1  0  0  0
 67 68  1  0  0  0
 67 69  1  0  0  0
 69 70  1  0  0  0
 69 71  1  0  0  0
 71 72  1  0  0  0
 71 73  1  0  0  0
 73 74  1  0  0  0
 73 75  1  0  0  0
 73 83  1  0  0  0
 75 76  1  0  0  0
 75 77  1  0  0  0
 75 78  1  0  0  0
 78 79  1  0  0  0
 78 80  1  0  0  0
 78 81  1  0  0  0
 81 82  1  0  0  0
 83 84  1  0  0  0
 83 85  1  0  0  0
 85 86  1  0  0  0
 85 87  1  0  0  0
 87 88  1  0  0  0
 87 89  1  0  0  0
 87103  1  0  0  0
 89 90  1  0  0  0
 89 91  1  0  0  0
 89 92  1  0  0  0
 92 93  1  0  0  0
 92101  1  0  0  0
 93 94  1  0  0  0
 93 95  1  0  0  0
 95 96  1  0  0  0
 95 97  1  0  0  0
 97 98  1  0  0  0
 97 99  1  0  0  0
 99100  1  0  0  0
 99101  1  0  0  0
101102  1  0  0  0
103104  1  0  0  0
103105  1  0  0  0
105106  1  0  0  0
105107  1  0  0  0
107108  1  0  0  0
107109  1  0  0  0
107110  1  0  0  0
110111  1  0  0  0
M  END
> <s_m_entry_name>
100frames.100

> <r_chorus_box_ax>
0

> <r_chorus_box_ay>
0

> <r_chorus_box_az>
0

> <r_chorus_box_bx>
0

> <r_chorus_box_by>
0

> <r_chorus_box_bz>
0

> <r_chorus_box_cx>
0

> <r_chorus_box_cy>
0

> <r_chorus_box_cz>
0

> <s_m_entry_id>
19

$$$$
