# Supplementary material for: Expanding the accessible chemical space by solid phase synthesis of bicyclic homodetic peptides
Source: Royal Society of Chemistry journal article supplement (doi:10.1039/c1cc15704c), 2011-01-01
Supplement: c1cc15704c_3.sdf [file c1cc15704c_3.sdf]

                    3D
 Structure written by MMmdl.
111114  0  0  1  0            999 V2000
    8.7970    4.4155   -7.5045 N   0  0  0  0  0  0
    8.3900    5.1964   -8.0116 H   0  0  0  0  0  0
    8.1716    3.9251   -6.2534 C   0  0  0  0  0  0
    8.4401    2.8766   -6.1040 H   0  0  0  0  0  0
    8.5913    4.4823   -5.4194 H   0  0  0  0  0  0
    6.6451    4.0085   -6.1492 C   0  0  0  0  0  0
    5.9831    4.5578   -7.0264 O   0  0  0  0  0  0
    6.0941    3.4012   -5.0926 N   0  0  0  0  0  0
    6.7351    2.9848   -4.4318 H   0  0  0  0  0  0
    4.6587    3.1653   -4.8302 C   0  0  1  0  0  0
    4.5928    2.4864   -3.9803 H   0  0  0  0  0  0
    3.9336    4.4586   -4.3918 C   0  0  0  0  0  0
    4.1791    5.2769   -5.0698 H   0  0  0  0  0  0
    2.8631    4.2679   -4.4833 H   0  0  0  0  0  0
    4.1723    4.9124   -2.9362 C   0  0  0  0  0  0
    3.9240    4.0878   -2.2650 H   0  0  0  0  0  0
    5.6090    5.3562   -2.6407 C   0  0  0  0  0  0
    5.6748    5.7744   -1.6342 H   0  0  0  0  0  0
    6.2812    4.5034   -2.6871 H   0  0  0  0  0  0
    5.9225    6.1131   -3.3589 H   0  0  0  0  0  0
    3.2428    6.0826   -2.6051 C   0  0  0  0  0  0
    3.3760    6.3631   -1.5600 H   0  0  0  0  0  0
    3.4672    6.9349   -3.2433 H   0  0  0  0  0  0
    2.2045    5.7808   -2.7535 H   0  0  0  0  0  0
    3.9716    2.4009   -5.9856 C   0  0  0  0  0  0
    3.9875    1.1721   -6.0134 O   0  0  0  0  0  0
    3.4308    3.1181   -6.9815 N   0  0  0  0  0  0
    3.4492    4.1225   -6.8909 H   0  0  0  0  0  0
    2.9404    2.5932   -8.2588 C   0  0  1  0  0  0
    2.3197    1.7241   -8.0581 H   0  0  0  0  0  0
    2.0755    3.6961   -8.8681 C   0  0  0  0  0  0
    1.6304    3.3398   -9.7956 H   0  0  0  0  0  0
    1.2886    3.9811   -8.1688 H   0  0  0  0  0  0
    2.7145    4.5565   -9.0798 H   0  0  0  0  0  0
    4.0653    2.1798   -9.2394 C   0  0  0  0  0  0
    3.8094    1.7833  -10.3788 O   0  0  0  0  0  0
    5.3137    2.3469   -8.8060 N   0  0  0  0  0  0
    5.3575    2.7227   -7.8712 H   0  0  0  0  0  0
    6.5268    2.5162   -9.6087 C   0  0  1  0  0  0
    7.2788    2.8191   -8.8839 H   0  0  0  0  0  0
    7.0208    1.1797  -10.2201 C   0  0  0  0  0  0
    7.2857    0.5191   -9.3923 H   0  0  0  0  0  0
    6.1923    0.7093  -10.7528 H   0  0  0  0  0  0
    8.2283    1.2188  -11.1919 C   0  0  0  0  0  0
    8.5746    0.1948  -11.3369 H   0  0  0  0  0  0
    7.8633    1.5557  -12.1643 H   0  0  0  0  0  0
    9.4438    2.0817  -10.8048 C   0  0  0  0  0  0
    9.1211    3.0973  -10.5816 H   0  0  0  0  0  0
    9.9466    1.6529   -9.9371 H   0  0  0  0  0  0
   10.4119    2.1325  -11.9987 C   0  0  0  0  0  0
   10.8446    1.1438  -12.1498 H   0  0  0  0  0  0
    9.8542    2.4093  -12.8897 H   0  0  0  0  0  0
   11.4802    3.1191  -11.8252 N   0  0  0  0  0  0
   11.2378    4.0953  -11.9553 H   0  0  0  0  0  0
    6.4497    3.7434  -10.5221 C   0  0  0  0  0  0
    6.5808    3.6712  -11.7448 O   0  0  0  0  0  0
    6.2971    4.9054   -9.8753 N   0  0  0  0  0  0
    6.0692    4.8890   -8.9047 H   0  0  0  0  0  0
    6.7440    6.1805  -10.3990 C   0  0  1  0  0  0
    7.6418    5.8605  -10.8950 H   0  0  0  0  0  0
    5.6595    6.6980  -11.3402 C   0  0  0  0  0  0
    5.6529    6.0585  -12.2162 H   0  0  0  0  0  0
    4.7292    6.5501  -10.7907 H   0  0  0  0  0  0
    5.7703    8.1396  -11.8098 C   0  0  0  0  0  0
    6.3892    8.4370  -13.0377 C   0  0  0  0  0  0
    6.7793    7.6357  -13.6508 H   0  0  0  0  0  0
    6.5183    9.7704  -13.4645 C   0  0  0  0  0  0
    6.9913    9.9921  -14.4067 H   0  0  0  0  0  0
    6.0206   10.8144  -12.6689 C   0  0  0  0  0  0
    6.1037   11.8422  -13.0012 H   0  0  0  0  0  0
    5.3918   10.5200  -11.4434 C   0  0  0  0  0  0
    4.9948   11.3211  -10.8355 H   0  0  0  0  0  0
    5.2549    9.1863  -11.0218 C   0  0  0  0  0  0
    4.7650    8.9685  -10.0843 H   0  0  0  0  0  0
    7.1834    7.2608   -9.3842 C   0  0  0  0  0  0
    6.5860    7.4003   -8.3148 O   0  0  0  0  0  0
    8.2569    8.0148   -9.7203 N   0  0  0  0  0  0
    8.8475    9.0548   -8.8834 C   0  0  0  0  0  0
    9.1748    8.6379   -7.9323 H   0  0  0  0  0  0
    8.1347    9.8672   -8.7230 H   0  0  0  0  0  0
   10.0763    9.5761   -9.6283 C   0  0  0  0  0  0
   10.9828    9.1640   -9.1822 H   0  0  0  0  0  0
   10.1218   10.6624   -9.6010 H   0  0  0  0  0  0
    9.9126    9.0650  -11.0599 C   0  0  0  0  0  0
   10.8837    8.9177  -11.5390 H   0  0  0  0  0  0
    9.3050    9.7701  -11.6265 H   0  0  0  0  0  0
    9.1307    7.7633  -10.8813 C   0  0  1  0  0  0
    8.5250    7.5660  -11.7681 H   0  0  0  0  0  0
   10.0422    6.5393  -10.6435 C   0  0  0  0  0  0
   10.7402    6.0662  -11.5397 O   0  0  0  0  0  0
    9.9976    6.0115   -9.4166 N   0  0  0  0  0  0
    9.4350    6.5265   -8.7608 H   0  0  0  0  0  0
   10.8113    4.9409   -8.8294 C   0  0  1  0  0  0
   11.2349    4.3150   -9.6022 H   0  0  0  0  0  0
   11.9077    5.6216   -7.9944 C   0  0  0  0  0  0
   11.4067    6.3011   -7.3036 H   0  0  0  0  0  0
   12.4312    4.8755   -7.3963 H   0  0  0  0  0  0
   12.9338    6.4127   -8.8174 C   0  0  0  0  0  0
   12.4049    7.1387   -9.4387 H   0  0  0  0  0  0
   13.5740    6.9776   -8.1325 H   0  0  0  0  0  0
   13.7916    5.4623   -9.6689 C   0  0  0  0  0  0
   14.7306    4.8388   -9.0965 O   0  0  0  0  0  0
   10.0258    4.0289   -7.8703 C   0  0  0  0  0  0
   10.5535    3.0106   -7.4153 O   0  0  0  0  0  0
   13.3584    5.1359  -10.8910 N   0  0  0  0  0  0
   12.5688    5.6545  -11.2517 H   0  0  0  0  0  0
   13.7926    3.9575  -11.6590 C   0  0  0  0  0  0
   13.9367    4.2626  -12.6950 H   0  0  0  0  0  0
   14.7413    3.5759  -11.2822 H   0  0  0  0  0  0
   12.7670    2.8110  -11.6733 C   0  0  0  0  0  0
   13.1234    1.6474  -11.5348 O   0  0  0  0  0  0
  1  2  1  0  0  0
  1  3  1  0  0  0
  1103  1  0  0  0
  3  4  1  0  0  0
  3  5  1  0  0  0
  3  6  1  0  0  0
  6  7  1  0  0  0
  6  8  1  0  0  0
  8  9  1  0  0  0
  8 10  1  0  0  0
 10 11  1  0  0  0
 10 12  1  0  0  0
 10 25  1  0  0  0
 12 13  1  0  0  0
 12 14  1  0  0  0
 12 15  1  0  0  0
 15 16  1  0  0  0
 15 17  1  0  0  0
 15 21  1  0  0  0
 17 18  1  0  0  0
 17 19  1  0  0  0
 17 20  1  0  0  0
 21 22  1  0  0  0
 21 23  1  0  0  0
 21 24  1  0  0  0
 25 26  1  0  0  0
 25 27  1  0  0  0
 27 28  1  0  0  0
 27 29  1  0  0  0
 29 30  1  0  0  0
 29 31  1  0  0  0
 29 35  1  0  0  0
 31 32  1  0  0  0
 31 33  1  0  0  0
 31 34  1  0  0  0
 35 36  1  0  0  0
 35 37  1  0  0  0
 37 38  1  0  0  0
 37 39  1  0  0  0
 39 40  1  0  0  0
 39 41  1  0  0  0
 39 55  1  0  0  0
 41 42  1  0  0  0
 41 43  1  0  0  0
 41 44  1  0  0  0
 44 45  1  0  0  0
 44 46  1  0  0  0
 44 47  1  0  0  0
 47 48  1  0  0  0
 47 49  1  0  0  0
 47 50  1  0  0  0
 50 51  1  0  0  0
 50 52  1  0  0  0
 50 53  1  0  0  0
 53 54  1  0  0  0
 53110  1  0  0  0
 55 56  1  0  0  0
 55 57  1  0  0  0
 57 58  1  0  0  0
 57 59  1  0  0  0
 59 60  1  0  0  0
 59 61  1  0  0  0
 59 75  1  0  0  0
 61 62  1  0  0  0
 61 63  1  0  0  0
 61 64  1  0  0  0
 64 65  1  0  0  0
 64 73  1  0  0  0
 65 66  1  0  0  0
 65 67  1  0  0  0
 67 68  1  0  0  0
 67 69  1  0  0  0
 69 70  1  0  0  0
 69 71  1  0  0  0
 71 72  1  0  0  0
 71 73  1  0  0  0
 73 74  1  0  0  0
 75 76  1  0  0  0
 75 77  1  0  0  0
 77 78  1  0  0  0
 77 87  1  0  0  0
 78 79  1  0  0  0
 78 80  1  0  0  0
 78 81  1  0  0  0
 81 82  1  0  0  0
 81 83  1  0  0  0
 81 84  1  0  0  0
 84 85  1  0  0  0
 84 86  1  0  0  0
 84 87  1  0  0  0
 87 88  1  0  0  0
 87 89  1  0  0  0
 89 90  1  0  0  0
 89 91  1  0  0  0
 91 92  1  0  0  0
 91 93  1  0  0  0
 93 94  1  0  0  0
 93 95  1  0  0  0
 93103  1  0  0  0
 95 96  1  0  0  0
 95 97  1  0  0  0
 95 98  1  0  0  0
 98 99  1  0  0  0
 98100  1  0  0  0
 98101  1  0  0  0
101102  1  0  0  0
101105  1  0  0  0
103104  1  0  0  0
105106  1  0  0  0
105107  1  0  0  0
107108  1  0  0  0
107109  1  0  0  0
107110  1  0  0  0
110111  1  0  0  0
M  END
> <s_m_entry_name>
6b-SA-out-100frames.100

> <r_chorus_box_ax>
0

> <r_chorus_box_ay>
0

> <r_chorus_box_az>
0

> <r_chorus_box_bx>
0

> <r_chorus_box_by>
0

> <r_chorus_box_bz>
0

> <r_chorus_box_cx>
0

> <r_chorus_box_cy>
0

> <r_chorus_box_cz>
0

> <s_m_entry_id>
29

$$$$
