# Supplementary material for: Expanding the accessible chemical space by solid phase synthesis of bicyclic homodetic peptides
Source: Royal Society of Chemistry journal article supplement (doi:10.1039/c1cc15704c), 2011-01-01
Supplement: c1cc15704c_4.sdf [file c1cc15704c_4.sdf]

                    3D
 Structure written by MMmdl.
138142  0  0  1  0            999 V2000
    3.7215    6.8117  -12.4446 N   0  0  0  0  0  0
    4.0716    6.3975  -13.2847 H   0  0  0  0  0  0
    3.0273    5.8879  -11.5550 C   0  0  1  0  0  0
    2.9582    6.3708  -10.5953 H   0  0  0  0  0  0
    1.6174    5.6201  -12.0758 C   0  0  0  0  0  0
    1.0617    6.5547  -12.1496 H   0  0  0  0  0  0
    1.6694    5.1548  -13.0587 H   0  0  0  0  0  0
    1.1071    4.9507  -11.3815 H   0  0  0  0  0  0
    3.8180    4.5861  -11.3434 C   0  0  0  0  0  0
    4.6553    4.2024  -12.1672 O   0  0  0  0  0  0
    3.5585    3.9345  -10.2069 N   0  0  0  0  0  0
    2.8186    4.3080   -9.6382 H   0  0  0  0  0  0
    4.3156    2.8024   -9.6588 C   0  0  1  0  0  0
    3.9983    2.7310   -8.6208 H   0  0  0  0  0  0
    3.8682    1.5048  -10.3658 C   0  0  0  0  0  0
    2.7819    1.5170  -10.4614 H   0  0  0  0  0  0
    4.2767    1.4955  -11.3713 H   0  0  0  0  0  0
    4.2485    0.2138   -9.6572 C   0  0  0  0  0  0
    3.6520   -0.1242   -8.4263 C   0  0  0  0  0  0
    2.9232    0.5375   -7.9762 H   0  0  0  0  0  0
    3.9887   -1.3244   -7.7817 C   0  0  0  0  0  0
    3.5267   -1.5842   -6.8354 H   0  0  0  0  0  0
    4.9177   -2.2022   -8.3624 C   0  0  0  0  0  0
    5.1844   -3.1288   -7.8671 H   0  0  0  0  0  0
    5.5182   -1.8662   -9.5903 C   0  0  0  0  0  0
    6.2388   -2.5397  -10.0399 H   0  0  0  0  0  0
    5.1885   -0.6622  -10.2382 C   0  0  0  0  0  0
    5.6574   -0.4114  -11.1783 H   0  0  0  0  0  0
    5.8507    3.0459   -9.6264 C   0  0  0  0  0  0
    6.6565    2.1324   -9.8059 O   0  0  0  0  0  0
    6.2561    4.3129   -9.4539 N   0  0  0  0  0  0
    5.5483    5.0057   -9.2644 H   0  0  0  0  0  0
    7.6164    4.8103   -9.6840 C   0  0  0  0  0  0
    8.2441    3.9991  -10.0510 H   0  0  0  0  0  0
    7.5712    5.5652  -10.4688 H   0  0  0  0  0  0
    8.3196    5.4194   -8.4621 C   0  0  0  0  0  0
    7.9308    5.1989   -7.3106 O   0  0  0  0  0  0
    9.3753    6.1993   -8.7355 N   0  0  0  0  0  0
    9.5760    6.3759   -9.7114 H   0  0  0  0  0  0
   10.2632    6.8257   -7.7364 C   0  0  2  0  0  0
   10.1045    6.3113   -6.7837 H   0  0  0  0  0  0
    9.8725    8.2985   -7.5050 C   0  0  0  0  0  0
    8.8487    8.3192   -7.1198 H   0  0  0  0  0  0
   10.5165    8.7103   -6.7208 H   0  0  0  0  0  0
    9.9275    9.2037   -8.7492 C   0  0  0  0  0  0
   10.8750    9.0639   -9.2710 H   0  0  0  0  0  0
    9.1165    8.9337   -9.4242 H   0  0  0  0  0  0
    9.8060   10.6757   -8.3265 C   0  0  0  0  0  0
    8.9154   10.8134   -7.7138 H   0  0  0  0  0  0
   10.6771   10.9253   -7.7222 H   0  0  0  0  0  0
    9.7644   11.6466   -9.5136 C   0  0  0  0  0  0
   10.0454   12.6358   -9.1513 H   0  0  0  0  0  0
   10.4936   11.3294  -10.2601 H   0  0  0  0  0  0
    8.4432   11.7204  -10.1234 N   0  0  0  0  0  0
    8.3193   11.2791  -11.0262 H   0  0  0  0  0  0
   11.7644    6.6196   -8.0391 C   0  0  0  0  0  0
   12.6052    7.4518   -7.6931 O   0  0  0  0  0  0
   12.0955    5.5145   -8.7194 N   0  0  0  0  0  0
   11.3417    4.8842   -8.9658 H   0  0  0  0  0  0
   13.4494    5.1372   -9.2064 C   0  0  1  0  0  0
   14.0748    6.0279   -9.2118 H   0  0  0  0  0  0
   14.1214    4.1001   -8.2772 C   0  0  0  0  0  0
   15.0833    3.8220   -8.7058 H   0  0  0  0  0  0
   14.4155    4.6851   -6.8924 C   0  0  0  0  0  0
   13.4890    4.9403   -6.3788 H   0  0  0  0  0  0
   14.9674    3.9586   -6.2968 H   0  0  0  0  0  0
   15.0270    5.5830   -6.9938 H   0  0  0  0  0  0
   13.2829    2.8234   -8.1086 C   0  0  0  0  0  0
   13.8316    2.1078   -7.4893 H   0  0  0  0  0  0
   12.3322    3.0489   -7.6266 H   0  0  0  0  0  0
   13.0971    2.3609   -9.0794 H   0  0  0  0  0  0
   13.3849    4.6635  -10.6679 C   0  0  0  0  0  0
   14.1549    3.8194  -11.1331 O   0  0  0  0  0  0
   12.3660    5.1571  -11.3689 N   0  0  0  0  0  0
   11.8807    5.9467  -10.9683 H   0  0  0  0  0  0
   11.6903    4.5205  -12.4994 C   0  0  1  0  0  0
   12.4266    4.0308  -13.1304 H   0  0  0  0  0  0
   10.7425    3.4712  -11.8914 C   0  0  0  0  0  0
   11.3405    2.7026  -11.3965 H   0  0  0  0  0  0
   10.1655    3.9442  -11.0953 H   0  0  0  0  0  0
    9.8062    2.7993  -12.8710 C   0  0  0  0  0  0
   10.2252    1.6482  -13.5627 C   0  0  0  0  0  0
   11.2076    1.2404  -13.3821 H   0  0  0  0  0  0
    9.3573    1.0204  -14.4712 C   0  0  0  0  0  0
    9.6689    0.1318  -14.9989 H   0  0  0  0  0  0
    8.0781    1.5589  -14.7115 C   0  0  0  0  0  0
    7.4143    1.0739  -15.4179 H   0  0  0  0  0  0
    7.6589    2.7088  -14.0247 C   0  0  0  0  0  0
    6.6677    3.1161  -14.1961 H   0  0  0  0  0  0
    8.5219    3.3301  -13.1039 C   0  0  0  0  0  0
    8.1911    4.2178  -12.5838 H   0  0  0  0  0  0
   10.9055    5.5908  -13.3011 C   0  0  0  0  0  0
   10.4252    6.5477  -12.6768 O   0  0  0  0  0  0
   10.7355    5.4684  -14.6365 N   0  0  0  0  0  0
   11.3083    4.4486  -15.5110 C   0  0  0  0  0  0
   10.5942    3.6309  -15.6471 H   0  0  0  0  0  0
   12.2508    4.0515  -15.1467 H   0  0  0  0  0  0
   11.5434    5.1492  -16.8467 C   0  0  0  0  0  0
   11.5450    4.4525  -17.6830 H   0  0  0  0  0  0
   12.4794    5.7064  -16.8091 H   0  0  0  0  0  0
   10.3599    6.1096  -16.9195 C   0  0  0  0  0  0
    9.4870    5.5692  -17.2983 H   0  0  0  0  0  0
   10.5711    6.9715  -17.5573 H   0  0  0  0  0  0
   10.1623    6.5341  -15.4597 C   0  0  1  0  0  0
   10.7380    7.4467  -15.2836 H   0  0  0  0  0  0
    8.6953    6.8851  -15.1405 C   0  0  0  0  0  0
    7.7476    6.1874  -15.5075 O   0  0  0  0  0  0
    8.5294    8.0332  -14.4902 N   0  0  0  0  0  0
    9.3798    8.5075  -14.2189 H   0  0  0  0  0  0
    7.2896    8.7929  -14.3062 C   0  0  1  0  0  0
    6.7716    8.8275  -15.2596 H   0  0  0  0  0  0
    6.3811    8.1358  -13.2463 C   0  0  0  0  0  0
    6.2403    7.0806  -13.4965 H   0  0  0  0  0  0
    6.8533    8.1880  -12.2636 H   0  0  0  0  0  0
    4.9887    8.7886  -13.1766 C   0  0  0  0  0  0
    5.0973    9.8339  -12.8813 H   0  0  0  0  0  0
    4.5338    8.7638  -14.1695 H   0  0  0  0  0  0
    4.0739    8.0708  -12.1726 C   0  0  0  0  0  0
    3.7770    8.6450  -11.0897 O   0  0  0  0  0  0
    7.6271   10.2451  -13.9199 C   0  0  0  0  0  0
    8.5442   10.4988  -13.1327 O   0  0  0  0  0  0
    6.8679   11.2055  -14.4565 N   0  0  0  0  0  0
    6.1502   10.9294  -15.1133 H   0  0  0  0  0  0
    7.0987   12.6432  -14.2746 C   0  0  1  0  0  0
    8.1250   12.8605  -14.5714 H   0  0  0  0  0  0
    6.1508   13.3700  -15.2398 C   0  0  0  0  0  0
    6.3333   13.0202  -16.2594 H   0  0  0  0  0  0
    5.1163   13.1681  -14.9644 H   0  0  0  0  0  0
    6.3326   14.4428  -15.1962 H   0  0  0  0  0  0
    6.9318   13.1600  -12.8194 C   0  0  0  0  0  0
    7.3773   14.2707  -12.5037 O   0  0  0  0  0  0
    6.3262   12.3637  -11.9279 N   0  0  0  0  0  0
    5.9729   11.4799  -12.2589 H   0  0  0  0  0  0
    6.1837   12.6731  -10.4976 C   0  0  0  0  0  0
    5.8199   13.6944  -10.3813 H   0  0  0  0  0  0
    5.4416   12.0024  -10.0704 H   0  0  0  0  0  0
    7.4769   12.5188   -9.6714 C   0  0  0  0  0  0
    7.6136   13.1507   -8.6260 O   0  0  0  0  0  0
  1  2  1  0  0  0
  1  3  1  0  0  0
  1118  1  0  0  0
  3  4  1  0  0  0
  3  5  1  0  0  0
  3  9  1  0  0  0
  5  6  1  0  0  0
  5  7  1  0  0  0
  5  8  1  0  0  0
  9 10  1  0  0  0
  9 11  1  0  0  0
 11 12  1  0  0  0
 11 13  1  0  0  0
 13 14  1  0  0  0
 13 15  1  0  0  0
 13 29  1  0  0  0
 15 16  1  0  0  0
 15 17  1  0  0  0
 15 18  1  0  0  0
 18 19  1  0  0  0
 18 27  1  0  0  0
 19 20  1  0  0  0
 19 21  1  0  0  0
 21 22  1  0  0  0
 21 23  1  0  0  0
 23 24  1  0  0  0
 23 25  1  0  0  0
 25 26  1  0  0  0
 25 27  1  0  0  0
 27 28  1  0  0  0
 29 30  1  0  0  0
 29 31  1  0  0  0
 31 32  1  0  0  0
 31 33  1  0  0  0
 33 34  1  0  0  0
 33 35  1  0  0  0
 33 36  1  0  0  0
 36 37  1  0  0  0
 36 38  1  0  0  0
 38 39  1  0  0  0
 38 40  1  0  0  0
 40 41  1  0  0  0
 40 42  1  0  0  0
 40 56  1  0  0  0
 42 43  1  0  0  0
 42 44  1  0  0  0
 42 45  1  0  0  0
 45 46  1  0  0  0
 45 47  1  0  0  0
 45 48  1  0  0  0
 48 49  1  0  0  0
 48 50  1  0  0  0
 48 51  1  0  0  0
 51 52  1  0  0  0
 51 53  1  0  0  0
 51 54  1  0  0  0
 54 55  1  0  0  0
 54137  1  0  0  0
 56 57  1  0  0  0
 56 58  1  0  0  0
 58 59  1  0  0  0
 58 60  1  0  0  0
 60 61  1  0  0  0
 60 62  1  0  0  0
 60 72  1  0  0  0
 62 63  1  0  0  0
 62 64  1  0  0  0
 62 68  1  0  0  0
 64 65  1  0  0  0
 64 66  1  0  0  0
 64 67  1  0  0  0
 68 69  1  0  0  0
 68 70  1  0  0  0
 68 71  1  0  0  0
 72 73  1  0  0  0
 72 74  1  0  0  0
 74 75  1  0  0  0
 74 76  1  0  0  0
 76 77  1  0  0  0
 76 78  1  0  0  0
 76 92  1  0  0  0
 78 79  1  0  0  0
 78 80  1  0  0  0
 78 81  1  0  0  0
 81 82  1  0  0  0
 81 90  1  0  0  0
 82 83  1  0  0  0
 82 84  1  0  0  0
 84 85  1  0  0  0
 84 86  1  0  0  0
 86 87  1  0  0  0
 86 88  1  0  0  0
 88 89  1  0  0  0
 88 90  1  0  0  0
 90 91  1  0  0  0
 92 93  1  0  0  0
 92 94  1  0  0  0
 94 95  1  0  0  0
 94104  1  0  0  0
 95 96  1  0  0  0
 95 97  1  0  0  0
 95 98  1  0  0  0
 98 99  1  0  0  0
 98100  1  0  0  0
 98101  1  0  0  0
101102  1  0  0  0
101103  1  0  0  0
101104  1  0  0  0
104105  1  0  0  0
104106  1  0  0  0
106107  1  0  0  0
106108  1  0  0  0
108109  1  0  0  0
108110  1  0  0  0
110111  1  0  0  0
110112  1  0  0  0
110120  1  0  0  0
112113  1  0  0  0
112114  1  0  0  0
112115  1  0  0  0
115116  1  0  0  0
115117  1  0  0  0
115118  1  0  0  0
118119  1  0  0  0
120121  1  0  0  0
120122  1  0  0  0
122123  1  0  0  0
122124  1  0  0  0
124125  1  0  0  0
124126  1  0  0  0
124130  1  0  0  0
126127  1  0  0  0
126128  1  0  0  0
126129  1  0  0  0
130131  1  0  0  0
130132  1  0  0  0
132133  1  0  0  0
132134  1  0  0  0
134135  1  0  0  0
134136  1  0  0  0
134137  1  0  0  0
137138  1  0  0  0
M  END
> <s_m_entry_name>
100frames.100

> <r_chorus_box_ax>
0

> <r_chorus_box_ay>
0

> <r_chorus_box_az>
0

> <r_chorus_box_bx>
0

> <r_chorus_box_by>
0

> <r_chorus_box_bz>
0

> <r_chorus_box_cx>
0

> <r_chorus_box_cy>
0

> <r_chorus_box_cz>
0

> <s_m_entry_id>
39

$$$$
