# Supplementary material for: Expanding the accessible chemical space by solid phase synthesis of bicyclic homodetic peptides
Source: Royal Society of Chemistry journal article supplement (doi:10.1039/c1cc15704c), 2011-01-01
Supplement: c1cc15704c_5.sdf [file c1cc15704c_5.sdf]

                    3D
 Structure written by MMmdl.
111114  0  0  1  0            999 V2000
    9.2332    7.2503   -5.2335 N   0  0  0  0  0  0
    9.8479    6.4525   -5.2661 H   0  0  0  0  0  0
    8.0664    7.1522   -4.3568 C   0  0  0  0  0  0
    8.3747    7.4138   -3.3449 H   0  0  0  0  0  0
    7.2925    7.8534   -4.6723 H   0  0  0  0  0  0
    7.4839    5.7308   -4.3428 C   0  0  0  0  0  0
    8.1290    4.8032   -3.8571 O   0  0  0  0  0  0
    6.2669    5.5615   -4.8800 N   0  0  0  0  0  0
    5.8222    6.3699   -5.2932 H   0  0  0  0  0  0
    5.5047    4.3039   -4.9474 C   0  0  1  0  0  0
    6.1468    3.4618   -4.6802 H   0  0  0  0  0  0
    4.3401    4.3858   -3.9340 C   0  0  0  0  0  0
    3.7507    5.2782   -4.1666 H   0  0  0  0  0  0
    3.6919    3.5127   -4.0603 H   0  0  0  0  0  0
    4.7497    4.4489   -2.4507 C   0  0  0  0  0  0
    5.3958    5.3113   -2.2772 H   0  0  0  0  0  0
    3.5027    4.6192   -1.5822 C   0  0  0  0  0  0
    2.9878    5.5360   -1.8586 H   0  0  0  0  0  0
    2.8277    3.7716   -1.7182 H   0  0  0  0  0  0
    3.7884    4.6945   -0.5305 H   0  0  0  0  0  0
    5.4721    3.1785   -1.9863 C   0  0  0  0  0  0
    6.4236    3.0762   -2.5029 H   0  0  0  0  0  0
    5.6908    3.2442   -0.9201 H   0  0  0  0  0  0
    4.8633    2.2933   -2.1734 H   0  0  0  0  0  0
    4.9812    4.0263   -6.3767 C   0  0  0  0  0  0
    5.1191    4.8615   -7.2675 O   0  0  0  0  0  0
    4.3634    2.8579   -6.5998 N   0  0  0  0  0  0
    4.2535    2.2253   -5.8409 H   0  0  0  0  0  0
    3.6431    2.4476   -7.8030 C   0  0  1  0  0  0
    3.3750    1.4065   -7.6382 H   0  0  0  0  0  0
    2.3285    3.2170   -7.8223 C   0  0  0  0  0  0
    2.5023    4.2633   -8.0542 H   0  0  0  0  0  0
    1.6457    2.7793   -8.5521 H   0  0  0  0  0  0
    1.9159    3.1268   -6.8147 H   0  0  0  0  0  0
    4.4950    2.4275   -9.0872 C   0  0  0  0  0  0
    4.0294    2.6522  -10.2072 O   0  0  0  0  0  0
    5.7701    2.1054   -8.8690 N   0  0  0  0  0  0
    5.9639    1.9057   -7.8985 H   0  0  0  0  0  0
    6.7698    1.6767   -9.8506 C   0  0  2  0  0  0
    6.2634    0.8990  -10.4047 H   0  0  0  0  0  0
    7.9429    0.9891   -9.1156 C   0  0  0  0  0  0
    7.5431    0.3420   -8.3325 H   0  0  0  0  0  0
    8.4530    0.3414   -9.8272 H   0  0  0  0  0  0
    9.0117    1.9010   -8.4813 C   0  0  0  0  0  0
    9.6989    1.2672   -7.9234 H   0  0  0  0  0  0
    9.5720    2.3790   -9.2806 H   0  0  0  0  0  0
    8.4667    2.9852   -7.5328 C   0  0  0  0  0  0
    7.9056    3.7327   -8.0962 H   0  0  0  0  0  0
    7.7808    2.5209   -6.8200 H   0  0  0  0  0  0
    9.5771    3.6874   -6.7360 C   0  0  0  0  0  0
    9.1364    4.4940   -6.1489 H   0  0  0  0  0  0
   10.0333    2.9697   -6.0526 H   0  0  0  0  0  0
   10.5979    4.2584   -7.6057 N   0  0  0  0  0  0
   10.2955    4.9503   -8.2801 H   0  0  0  0  0  0
    7.2533    2.7164  -10.8991 C   0  0  0  0  0  0
    8.2103    2.4544  -11.6358 O   0  0  0  0  0  0
    6.6298    3.8948  -10.9619 N   0  0  0  0  0  0
    5.7798    3.9985  -10.4195 H   0  0  0  0  0  0
    7.0342    5.0486  -11.7805 C   0  0  1  0  0  0
    7.4658    4.6709  -12.7103 H   0  0  0  0  0  0
    5.7224    5.7764  -12.1557 C   0  0  0  0  0  0
    5.8891    6.2545  -13.1198 H   0  0  0  0  0  0
    4.9545    5.0183  -12.3184 H   0  0  0  0  0  0
    5.1165    6.8017  -11.2006 C   0  0  0  0  0  0
    5.3391    6.7635   -9.8117 C   0  0  0  0  0  0
    5.9581    5.9960   -9.3805 H   0  0  0  0  0  0
    4.7689    7.7384   -8.9650 C   0  0  0  0  0  0
    4.9608    7.7084   -7.9037 H   0  0  0  0  0  0
    3.9572    8.7508   -9.5048 C   0  0  0  0  0  0
    3.5246    9.5046   -8.8616 H   0  0  0  0  0  0
    3.7266    8.7861  -10.8885 C   0  0  0  0  0  0
    3.1048    9.5597  -11.3137 H   0  0  0  0  0  0
    4.3011    7.8202  -11.7284 C   0  0  0  0  0  0
    4.1112    7.8512  -12.7888 H   0  0  0  0  0  0
    8.1589    5.8789  -11.0848 C   0  0  0  0  0  0
    8.8275    5.3278  -10.2011 O   0  0  0  0  0  0
    8.4289    7.1638  -11.4234 N   0  0  0  0  0  0
    7.9961    7.8844  -12.6144 C   0  0  0  0  0  0
    6.9739    8.2443  -12.4921 H   0  0  0  0  0  0
    8.0816    7.2622  -13.5102 H   0  0  0  0  0  0
    8.9195    9.0986  -12.7362 C   0  0  0  0  0  0
    8.4275    9.9363  -13.2366 H   0  0  0  0  0  0
    9.8325    8.8119  -13.2618 H   0  0  0  0  0  0
    9.2304    9.4134  -11.2706 C   0  0  0  0  0  0
    8.3895    9.9444  -10.8202 H   0  0  0  0  0  0
   10.1630    9.9702  -11.1391 H   0  0  0  0  0  0
    9.3600    8.0181  -10.6727 C   0  0  1  0  0  0
   10.3821    7.6767  -10.8591 H   0  0  0  0  0  0
    9.1800    8.0213   -9.1555 C   0  0  0  0  0  0
    8.1453    7.6524   -8.6010 O   0  0  0  0  0  0
   10.2655    8.3970   -8.4889 N   0  0  0  0  0  0
   11.0179    8.8003   -9.0278 H   0  0  0  0  0  0
   10.5831    7.9558   -7.1253 C   0  0  1  0  0  0
   10.6939    6.8772   -7.1734 H   0  0  0  0  0  0
   11.9269    8.5482   -6.6877 C   0  0  0  0  0  0
   11.8466    9.6324   -6.7594 H   0  0  0  0  0  0
   12.0966    8.2654   -5.6492 H   0  0  0  0  0  0
   13.1415    8.1165   -7.5348 C   0  0  0  0  0  0
   13.0086    8.4807   -8.5587 H   0  0  0  0  0  0
   14.0305    8.5980   -7.1238 H   0  0  0  0  0  0
   13.3465    6.5981   -7.5688 C   0  0  0  0  0  0
   13.9680    6.0323   -6.6269 O   0  0  0  0  0  0
    9.4820    8.2478   -6.0867 C   0  0  0  0  0  0
    8.8744    9.3204   -6.0591 O   0  0  0  0  0  0
   12.7646    5.9246   -8.5652 N   0  0  0  0  0  0
   12.2669    6.4640   -9.2604 H   0  0  0  0  0  0
   12.7805    4.4601   -8.6956 C   0  0  0  0  0  0
   12.4623    4.1987   -9.7043 H   0  0  0  0  0  0
   13.7921    4.0794   -8.5394 H   0  0  0  0  0  0
   11.8288    3.7647   -7.7165 C   0  0  0  0  0  0
   12.2072    2.8083   -7.0438 O   0  0  0  0  0  0
  1  2  1  0  0  0
  1  3  1  0  0  0
  1103  1  0  0  0
  3  4  1  0  0  0
  3  5  1  0  0  0
  3  6  1  0  0  0
  6  7  1  0  0  0
  6  8  1  0  0  0
  8  9  1  0  0  0
  8 10  1  0  0  0
 10 11  1  0  0  0
 10 12  1  0  0  0
 10 25  1  0  0  0
 12 13  1  0  0  0
 12 14  1  0  0  0
 12 15  1  0  0  0
 15 16  1  0  0  0
 15 17  1  0  0  0
 15 21  1  0  0  0
 17 18  1  0  0  0
 17 19  1  0  0  0
 17 20  1  0  0  0
 21 22  1  0  0  0
 21 23  1  0  0  0
 21 24  1  0  0  0
 25 26  1  0  0  0
 25 27  1  0  0  0
 27 28  1  0  0  0
 27 29  1  0  0  0
 29 30  1  0  0  0
 29 31  1  0  0  0
 29 35  1  0  0  0
 31 32  1  0  0  0
 31 33  1  0  0  0
 31 34  1  0  0  0
 35 36  1  0  0  0
 35 37  1  0  0  0
 37 38  1  0  0  0
 37 39  1  0  0  0
 39 40  1  0  0  0
 39 41  1  0  0  0
 39 55  1  0  0  0
 41 42  1  0  0  0
 41 43  1  0  0  0
 41 44  1  0  0  0
 44 45  1  0  0  0
 44 46  1  0  0  0
 44 47  1  0  0  0
 47 48  1  0  0  0
 47 49  1  0  0  0
 47 50  1  0  0  0
 50 51  1  0  0  0
 50 52  1  0  0  0
 50 53  1  0  0  0
 53 54  1  0  0  0
 53110  1  0  0  0
 55 56  1  0  0  0
 55 57  1  0  0  0
 57 58  1  0  0  0
 57 59  1  0  0  0
 59 60  1  0  0  0
 59 61  1  0  0  0
 59 75  1  0  0  0
 61 62  1  0  0  0
 61 63  1  0  0  0
 61 64  1  0  0  0
 64 65  1  0  0  0
 64 73  1  0  0  0
 65 66  1  0  0  0
 65 67  1  0  0  0
 67 68  1  0  0  0
 67 69  1  0  0  0
 69 70  1  0  0  0
 69 71  1  0  0  0
 71 72  1  0  0  0
 71 73  1  0  0  0
 73 74  1  0  0  0
 75 76  1  0  0  0
 75 77  1  0  0  0
 77 78  1  0  0  0
 77 87  1  0  0  0
 78 79  1  0  0  0
 78 80  1  0  0  0
 78 81  1  0  0  0
 81 82  1  0  0  0
 81 83  1  0  0  0
 81 84  1  0  0  0
 84 85  1  0  0  0
 84 86  1  0  0  0
 84 87  1  0  0  0
 87 88  1  0  0  0
 87 89  1  0  0  0
 89 90  1  0  0  0
 89 91  1  0  0  0
 91 92  1  0  0  0
 91 93  1  0  0  0
 93 94  1  0  0  0
 93 95  1  0  0  0
 93103  1  0  0  0
 95 96  1  0  0  0
 95 97  1  0  0  0
 95 98  1  0  0  0
 98 99  1  0  0  0
 98100  1  0  0  0
 98101  1  0  0  0
101102  1  0  0  0
101105  1  0  0  0
103104  1  0  0  0
105106  1  0  0  0
105107  1  0  0  0
107108  1  0  0  0
107109  1  0  0  0
107110  1  0  0  0
110111  1  0  0  0
M  END
> <s_m_entry_name>
7b-SA-out-100frames.100

> <r_chorus_box_ax>
0

> <r_chorus_box_ay>
0

> <r_chorus_box_az>
0

> <r_chorus_box_bx>
0

> <r_chorus_box_by>
0

> <r_chorus_box_bz>
0

> <r_chorus_box_cx>
0

> <r_chorus_box_cy>
0

> <r_chorus_box_cz>
0

> <s_m_entry_id>
49

$$$$
